# Supplementary material for: Characteristics of the Quality Improvement Content of Cardiac Catheterization Peer Reviews in the Veterans Affairs Clinical Assessment, Reporting, and Tracking Program
Source: PubMed Central journal article supplement (PMC6681545; doi:10.1001/jamanetworkopen.2019.8393), 2019-08-02
Supplement: jamanetwopen-2-e198393-s001.pdf [file jamanetwopen-2-e198393-s001.pdf]

## Supplementary Online Content

Doll JA, Plomondon ME, Waldo SW. Characteristics of the quality improvement content of cardiac catheterization peer reviews in the Veterans Affairs Clinical Assessment, Reporting, and Tracking program. *JAMA Netw Open*. 2019;2(8):e198393.  
doi:10.1001/jamanetworkopen.2019.8393

**eAppendix.** Templated Peer Review Form for the VA CART MAE Program

This supplementary material has been provided by the authors to give readers additional information about their work.

**eAppendix.** Templated Peer Review Form for the VA CART MAE Program

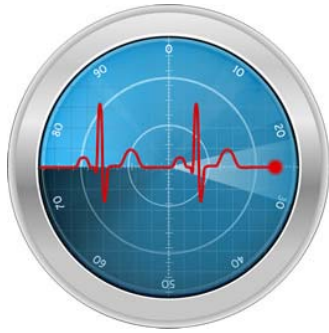

# CART

VA CLINICAL  
ASSESSMENT  
REPORTING  
& TRACKING  
**PROGRAM**

**Brief Summary of Clinical Course (free text):**

**Assessment (choose one):**

- Expected MAE
- Unexpected MAE

**Assessment Details:**

**Opportunities identified for system or process improvements?**

- Yes (if yes, please explain)
- No

**Summary Assessment of Care: Clinical Judgement**

- No Concern
- Minor Concern
- Major Concern

**Summary Assessment of Care: Procedural Indication**

- No Concern
- Minor Concern
- Major Concern

**Summary Assessment of Care: Resident/Fellow Supervision**

- No Concern
- Minor Concern
- Major Concern

**Summary Assessment of Care: Technical Performance of the Procedure**

- No Concern
- Minor Concern
- Major Concern

**Final Assessment Level:**

- Level 1: Most Experienced, competent practitioners would have managed the case similarly in all aspects
- Level 2: Most experienced, competent practitioners would have managed the case differently in one or more aspects
- Level 3: most experienced, competent practitioners would have managed the case differently in several aspects.

**Next Steps (free text):**
